# Supplementary material for: Percent Emphysema, Airflow Obstruction, and Impaired Left Ventricular Filling
Source: Atypon-hosted journal article supplement (doi:10.1056/nejmoa0808836), 2010-01-20
Supplement: nejm_barr_217sa1.pdf [file nejm_barr_217sa1.pdf]

## Supplementary Appendix

This appendix has been provided by the authors to give readers additional information about their work.

Supplement to: Barr RG, Bluemke DA, Ahmed FS, et al. Percent emphysema, airflow obstruction, and impaired left ventricular filling. *N Engl J Med* 2010;362:217-27.

(PDF updated April 6, 2010.)

# Percent Emphysema, Airflow Obstruction and Impaired Left Ventricular Filling

## Online Supplementary Appendix

R Graham Barr, MD DrPH, David A Bluemke, MD PhD, Firas S Ahmed, MD MPH, J Jeffery Carr, MD MS, Paul L Enright, MD, Eric A Hoffman, PhD, Rui Jiang, MD DrPH, Steven M Kawut, MD MS, Richard A Kronmal, PhD, Joao A Lima, MD, Eyal Shahar, MD MPH, Lewis J Smith, MD, Karol E Watson, MD PhD

### Correspondence:

R Graham Barr, MD DrPH  
Columbia University Medical Center  
630 West 168th Street, PH 9 East - Room 105  
New York, NY 10032  
Fax: 212-305-9349  
E-mail: [rgb9@columbia.edu](mailto:rgb9@columbia.edu)

### Table of Contents for Online Supplementary Appendix

|                                                                                                                                                                                                                                                             |    |
|-------------------------------------------------------------------------------------------------------------------------------------------------------------------------------------------------------------------------------------------------------------|----|
| <b>Online Supplement Figure 1.</b> Flow diagram of participant selection in the Multi-Ethnic Study of Atherosclerosis (MESA) Lung Study. ....                                                                                                               | 3  |
| <b>Online Supplement Figure 2.</b> Continuous relationships of the percent emphysema to left ventricular end-diastolic volume and stroke volume in current smokers, past smokers and never smokers.....                                                     | 4  |
| <b>Online Supplement Figure 3.</b> Continuous relationships of the forced expiratory volume in one second / forced vital capacity ratio to left ventricular end-diastolic volume and stroke volume in current smokers, past smokers and never smokers. .... | 6  |
| <b>Online Supplement Table 1.</b> Characteristics of MESA-Lung participants without a restrictive pattern of spirometry with and without left ventricular measures. ....                                                                                    | 8  |
| <b>Online Supplement Table 2.</b> Characteristics of participants stratified by smoking status.....                                                                                                                                                         | 11 |

**Online Supplement Table 3.** Percent emphysema on CT scan, lung function, and cardiac structure and function on magnetic resonance image, stratified by smoking status..... 13

**Online Supplement Table 4.** Predicted measures of left ventricular structure and function by quintiles of percent emphysema and mean differences per 10 percentage point change in percent emphysema among current, former and never smokers. .... 14

**Online Supplement Table 5.** Predicted measures of left ventricular structure and function by quintiles of the FEV<sub>1</sub>/FVC ratio and mean differences per 10 percentage point change in the FEV<sub>1</sub>/FVC ratio among current, former and never smokers. .... 18

**Online Supplement Table 6.** Predicted measures of left ventricular structure and function by quintiles of the forced expiratory volume in one second and mean differences per 750 mL increase in forced expiratory volume in one second among current, former and never smokers..... 22

**Online Supplement Table 7.** Mean differences and 95% confidence intervals per 10 percentage point increase in percent emphysema among current, former and never smokers in sensitivity analyses. .... 26

**Online Supplement Table 8.** Mean differences and 95% confidence intervals per 10 percentage point increase in FEV<sub>1</sub>/FVC ratio among current, former and never smokers in sensitivity analyses. ... 30

**Online Supplement Table 9.** Mean differences and 95% confidence intervals per 10 percentage point increase in percent emphysema among current, former and never smokers in CT-scan related sensitivity analyses..... 34

**Online Supplement Figure 1.** Flow diagram of participant selection in the Multi-Ethnic Study of Atherosclerosis (MESA) Lung Study.

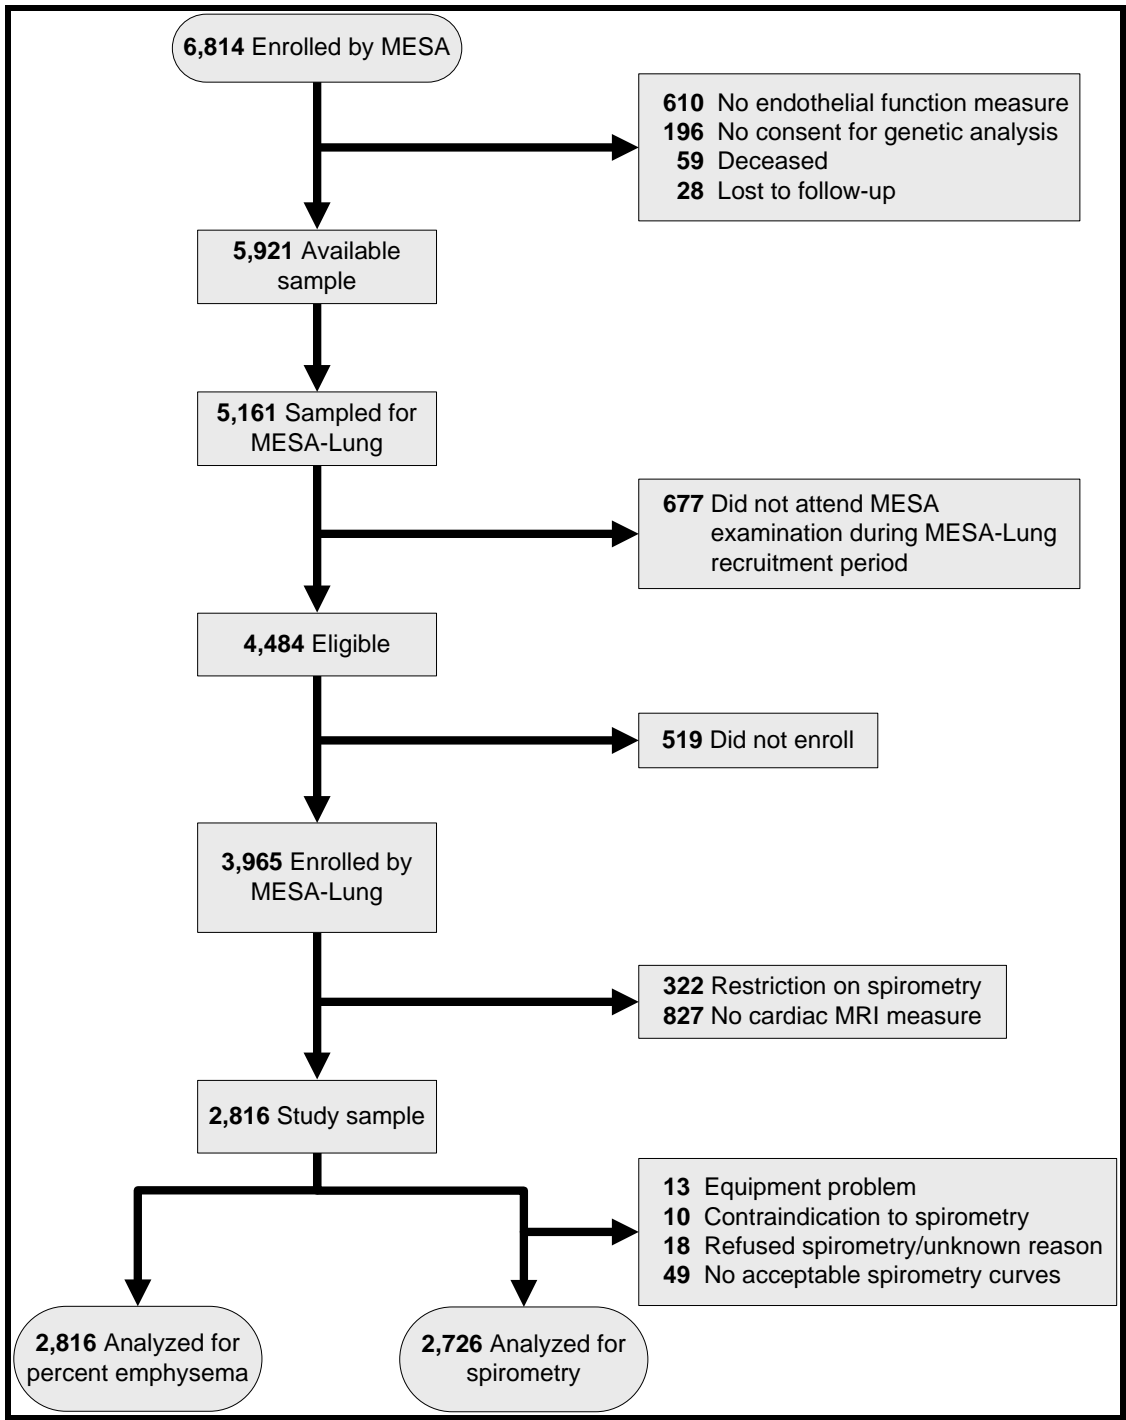

MESA = Multi-Ethnic Study of Atherosclerosis; MRI = Magnetic resonance imaging.

**Online Supplement Figure 2.** Continuous relationships of the percent emphysema to left ventricular end-diastolic volume and stroke volume in current smokers, past smokers and never smokers.

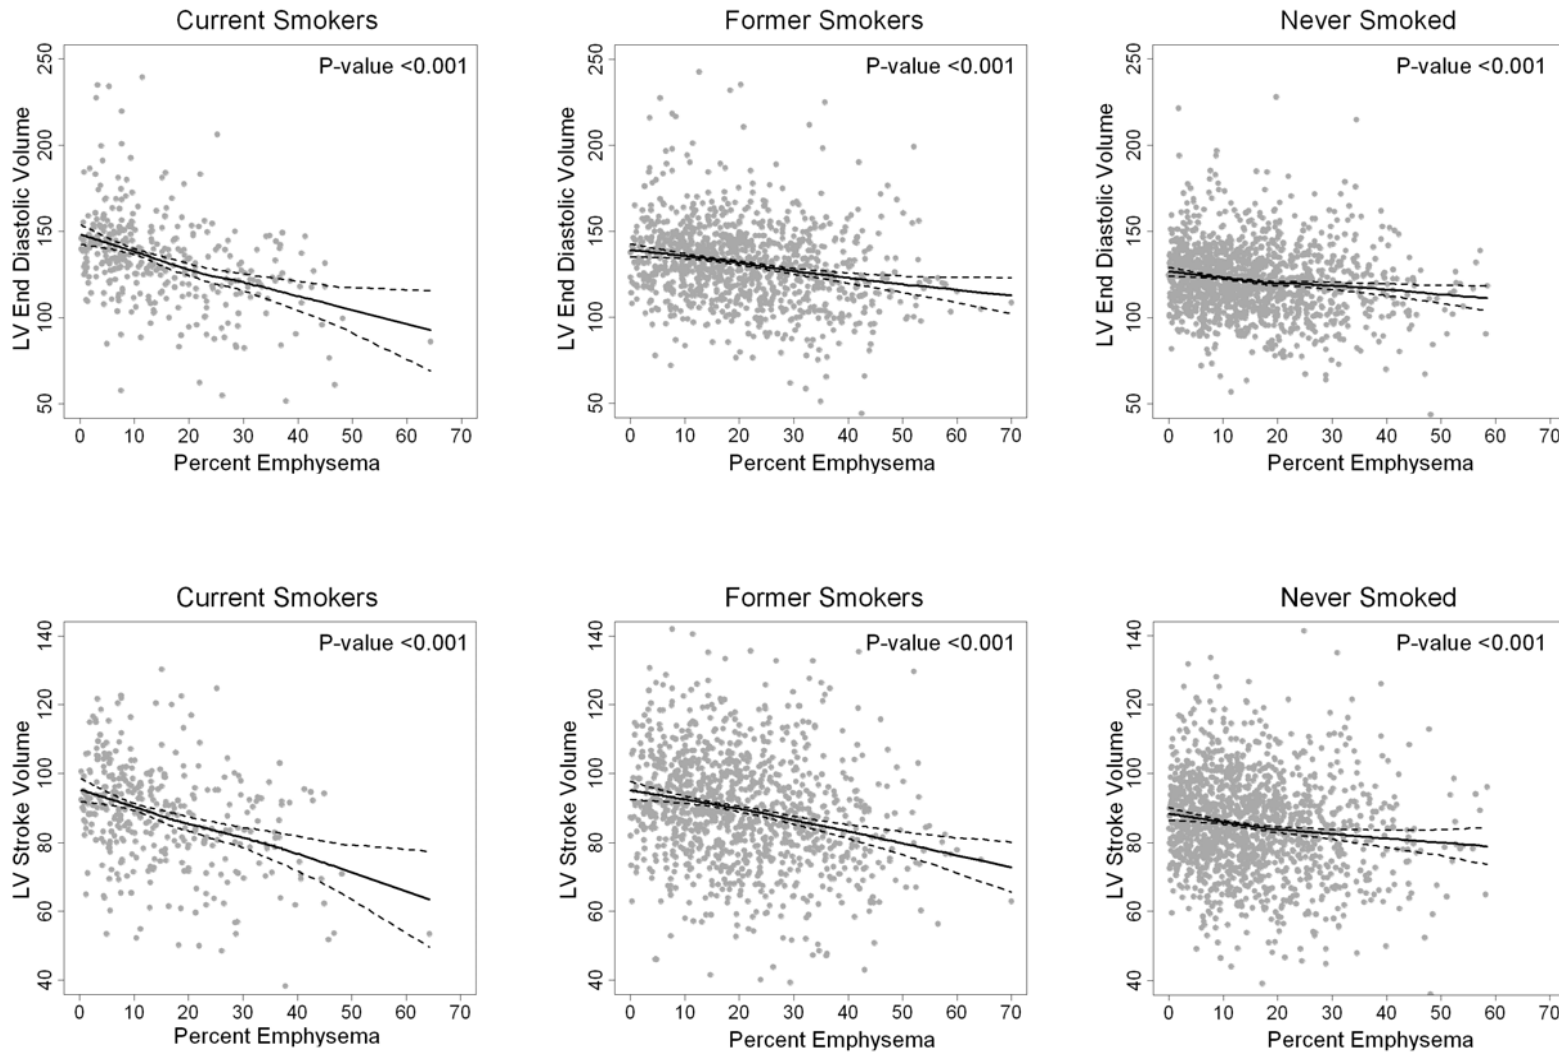

Multivariate relationships of the percent emphysema to left ventricular end-diastolic volume and stroke volume in current, former and never smokers. Thick lines = smoothed regression lines adjusted for age, race/ethnicity, gender, body surface area, pack-years, urine cotinine, educational attainment, diabetes mellitus, fasting plasma glucose, body mass index, hypertension, systolic and diastolic blood pressure, C-reactive protein, fibrinogen, CT scanner type and mA dose. Thin lines = 95% confidence intervals. Dots = predicted + residual values. The smoothing functions did not improve model fit compared to linear terms for the left ventricular end-diastolic volume (P=0.49, P=0.33 and P=0.18 for current, former and never smokers, respectively) and for the left ventricular stroke volume (P=0.68, P=0.86 and P=0.65, respectively), which implies that no thresholds in the relationships of percent emphysema to left ventricular end-diastolic volume and stroke volume could be demonstrated.

**Online Supplement Figure 3.** Continuous relationships of the forced expiratory volume in one second / forced vital capacity ratio to left ventricular end-diastolic volume and stroke volume in current smokers, past smokers and never smokers.

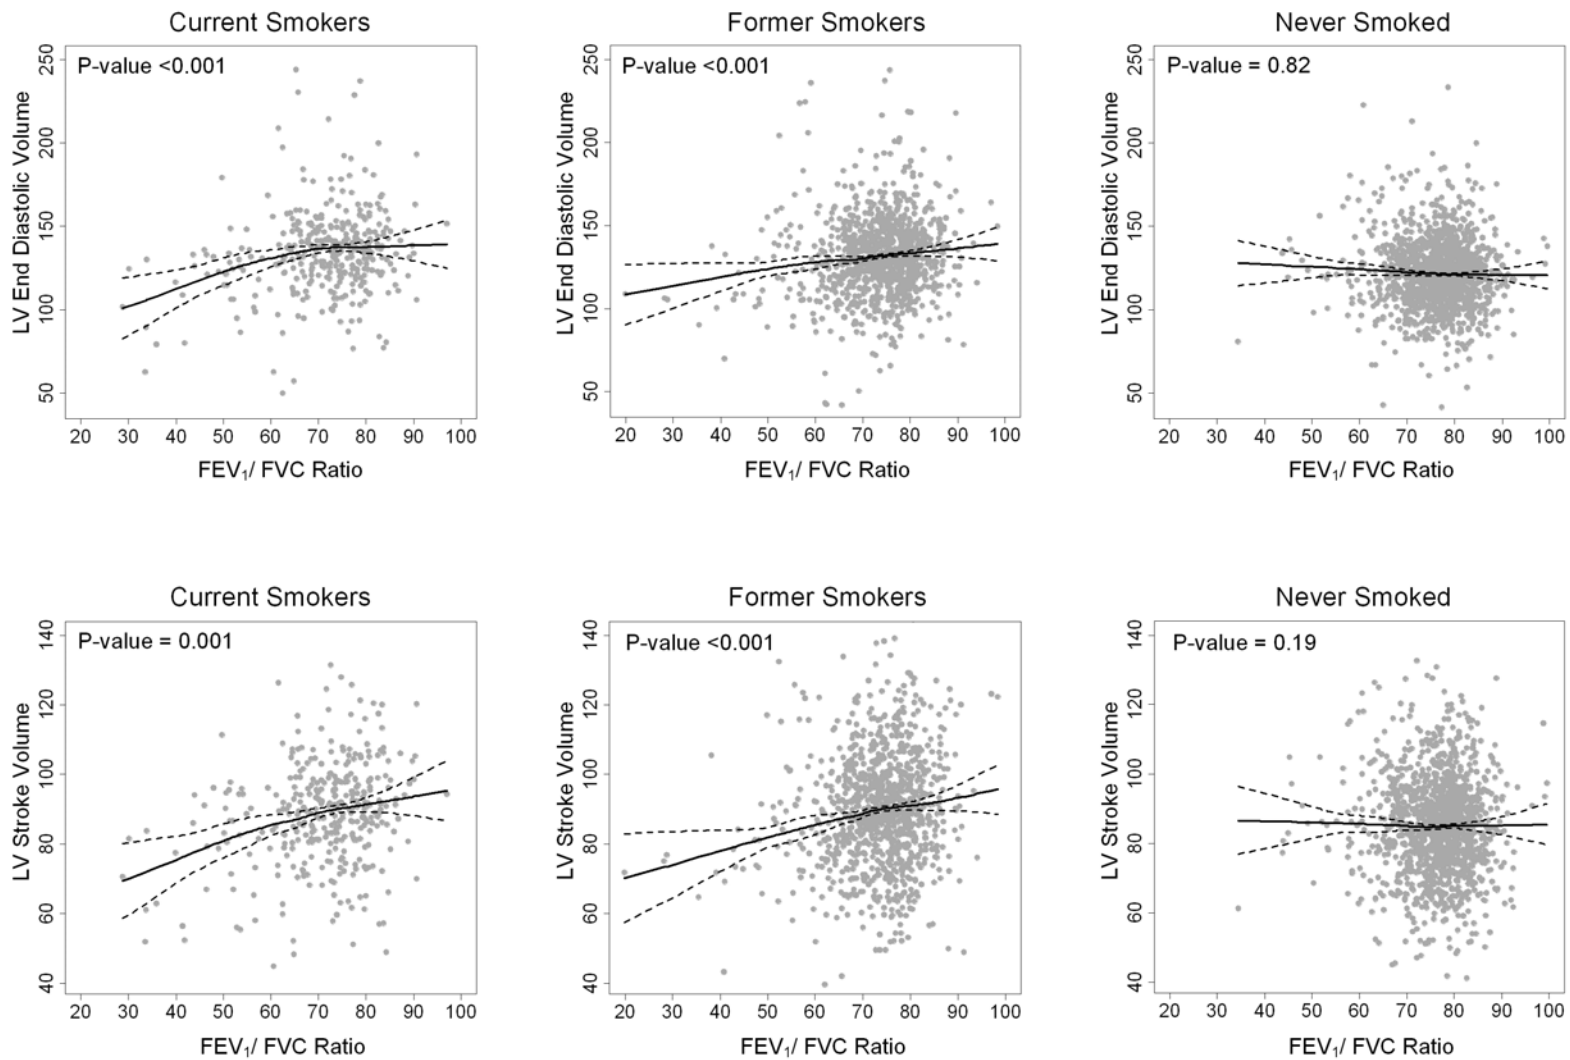

Multivariate relationship of the forced expiratory volume in one second / forced vital capacity ratio to left ventricular end-diastolic volume and stroke volume in current, former and never smokers. Thick lines = smoothed regression lines adjusted for age, race/ethnicity, gender, body surface area, pack-years, urine cotinine, educational attainment, height, diabetes mellitus, fasting plasma glucose, hypertension, systolic and diastolic blood pressure, C-reactive protein, and fibrinogen. Thin lines = 95% confidence intervals. Dots = predicted + residual values. The smoothing functions did not improve model fit compared to linear terms for the left ventricular end-diastolic volume (P=0.05, P=0.59 and P=0.46 for current, former and never smokers, respectively) and for the left ventricular stroke volume (P=0.36, P=0.53 and P=0.42, respectively).

**Online Supplement Table 1** Characteristics of MESA-Lung participants without a restrictive pattern of spirometry with and without left ventricular measures.

|                                                   | <b>With LV Measures</b> | <b>Without LV Measures</b> |
|---------------------------------------------------|-------------------------|----------------------------|
|                                                   | N=2816                  | N=827                      |
| Age, mean $\pm$ SD, years                         | 61 $\pm$ 10             | 63 $\pm$ 10                |
| Male gender, N (%)                                | 1383 (49)               | 402 (49)                   |
| Race/ethnicity, %                                 |                         |                            |
| White                                             | 1005 (36)               | 274 (33)                   |
| African American                                  | 701 (25)                | 264 (32)                   |
| Hispanic                                          | 616 (23)                | 192 (23)                   |
| Asian                                             | 494 (18)                | 97 (12)                    |
| Educational attainment, %                         |                         |                            |
| No high school degree                             | 440 (16)                | 167 (20)                   |
| High school degree                                | 505 (18)                | 153 (19)                   |
| Some college                                      | 762 (27)                | 251 (35)                   |
| College degree                                    | 534 (19)                | 133 (16)                   |
| Greater than bachelor's degree                    | 575 (20)                | 123 (10)                   |
| Height, mean $\pm$ SD, cm                         | 166 $\pm$ 10            | 167 $\pm$ 10               |
| Body surface area, mean $\pm$ SD, m <sup>2</sup>  | 1.84 $\pm$ 0.22         | 1.90 $\pm$ 0.24            |
| Body mass index, mean $\pm$ SD, kg/m <sup>2</sup> | 27.4 $\pm$ 4.8          | 29.7 $\pm$ 6.1             |
| Cigarette smoking status, %                       |                         |                            |
| Never                                             | 1379 (49)               | 338 (41)                   |
| Former                                            | 1067 (38)               | 346 (42)                   |

|                                                                |                         |                         |
|----------------------------------------------------------------|-------------------------|-------------------------|
| Current                                                        | 370 (13)                | 143 (17)                |
| Pack-years of smoking, median                                  | 16                      | 19                      |
| (IQR)                                                          | (6.0, 34)               | (7, 37)                 |
| Hypertension, %                                                | 1001 (36)               | 356 (43)                |
| Systolic blood pressure, mean $\pm$ SD, mmHg                   | 124 $\pm$ 20            | 128 $\pm$ 20            |
| Diastolic blood pressure, mean $\pm$ SD, mmHg                  | 72 $\pm$ 10             | 72 $\pm$ 10             |
| Diabetes mellitus, %                                           | 249 (9)                 | 93 (11)                 |
| Fasting plasma glucose, median                                 | 96 [5.33]               | 98 [5.44]               |
| (IQR), mg/ 100mL [mmol/L]                                      | (89[4.94], 104[5.77])   | (92[5.11], 108[5.99])   |
| C-reactive protein, median                                     | 1.6                     | 2.15                    |
| (IQR), mg/ L [ $\mu$ g/L]                                      | (0.7, 3.8)              | (0.96, 4.56)            |
| Fibrinogen, median                                             | 332[9.76]               | 343[10.09]              |
| (IQR), mg/100 mL [ $\mu$ mol/L]                                | (292[8.59], 382[11.23]) | (297[8.73], 393[11.56]) |
| Family history of emphysema, %                                 | 120 (4)                 | 42 (5)                  |
| Asthma before the age of 45 years, %                           | 202 (7)                 | 84 (10)                 |
| MRC-defined chronic bronchitis, %                              | 221 (8)                 | 64 (8)                  |
| Obstructive sleep apnea, n (%)                                 | 79 (3)                  | 30 (4)                  |
| Self-report of COPD, emphysema or chronic<br>bronchitis, n (%) | 205 (7)                 | 69 (8)                  |
| FEV <sub>1</sub> percent of predicted, mean $\pm$ SD, %        | 96.2 $\pm$ 17.1         | 93.9 $\pm$ 18.6         |
| FEV <sub>1</sub> /FVC ratio, mean $\pm$ SD, %                  | 74.6 $\pm$ 8.6          | 74.3 $\pm$ 9.19         |
| Percent emphysema, median                                      | 15                      | 13.5                    |
| (IQR), %                                                       | (7.8, 24.9)             | (6.9, 23.4)             |

SD = Standard deviation; IQR = Interquartile range; MRC = Medical Research Council; FEV<sub>1</sub> =  
Forced expiratory volume in one second; FVC = Forced vital capacity; LV = Left ventricle

**Online Supplement Table 2.** Characteristics of participants stratified by smoking status

|                                                   | <b>Current<br/>Smoker</b><br>N=370 | <b>Past<br/>Smoker</b><br>N=1067 | <b>Never<br/>Smoked</b><br>N=1379 |
|---------------------------------------------------|------------------------------------|----------------------------------|-----------------------------------|
| Age, mean $\pm$ SD, years                         | 58 $\pm$ 9                         | 62 $\pm$ 10                      | 61 $\pm$ 10                       |
| Male gender, N (%)                                | 214 (58)                           | 664 (62)                         | 505 (37)                          |
| Race/ethnicity %                                  |                                    |                                  |                                   |
| White                                             | 115 (31)                           | 479 (45)                         | 411 (30)                          |
| African American                                  | 138 (37)                           | 265 (25)                         | 298 (22)                          |
| Hispanic                                          | 86 (23)                            | 212 (20)                         | 318 (23)                          |
| Asian                                             | 31 (8)                             | 111 (10)                         | 352 (26)                          |
| Educational attainment, %                         |                                    |                                  |                                   |
| No high school degree                             | 59 (16)                            | 147 (14)                         | 234 (17)                          |
| High school degree                                | 79 (21)                            | 178 (17)                         | 248 (18)                          |
| Some college                                      | 136 (37)                           | 292 (27)                         | 334 (24)                          |
| College degree                                    | 47 (13)                            | 207 (19)                         | 280 (20)                          |
| Greater than bachelor's degree                    | 49 (13)                            | 243 (23)                         | 283 (20)                          |
| Height, mean $\pm$ SD, cm                         | 169 $\pm$ 10                       | 169 $\pm$ 10                     | 164 $\pm$ 10                      |
| Body surface area, mean $\pm$ SD                  | 1.89 $\pm$ 0.22                    | 1.89 $\pm$ 0.21                  | 1.79 $\pm$ 0.22                   |
| Body mass index, mean $\pm$ SD, kg/m <sup>2</sup> | 27.5 $\pm$ 4.8                     | 27.7 $\pm$ 4.7                   | 27.2 $\pm$ 4.8                    |
| Pack-years of smoking, median<br>(IQR)            | 24<br>(10.9, 43.5)                 | 14<br>(5.0, 31.0)                | --                                |
| Hypertension, %                                   | 111 (30)                           | 396 (37)                         | 494 (36)                          |

|                                                                |                                          |                                         |                                         |
|----------------------------------------------------------------|------------------------------------------|-----------------------------------------|-----------------------------------------|
| Systolic blood pressure, mean $\pm$ SD, mmHg                   | 123 $\pm$ 21                             | 125 $\pm$ 19                            | 123 $\pm$ 19                            |
| Diastolic blood pressure, mean $\pm$ SD, mmHg                  | 73 $\pm$ 10                              | 72 $\pm$ 10                             | 71 $\pm$ 10                             |
| Diabetes mellitus, %                                           | 33 (9)                                   | 104 (10)                                | 112 (8)                                 |
| Fasting plasma glucose, median<br>(IQR), mg/ dL [mmol/L]       | 95[5.27]<br>(89[4.94],<br>104[5.77])     | 96[5.33]<br>(90[5.00],<br>105[5.83])    | 95[5.27]<br>(89[4.94],<br>104[5.77])    |
| C-reactive protein, median<br>(IQR), mg/ L                     | 2.2<br>(1.0, 4.6)                        | 1.5<br>(0.7, 3.6)                       | 1.6<br>(0.7, 3.6)                       |
| Fibrinogen, median<br>(IQR), mg/dL [ $\mu$ mol/L]              | 340[10.00]<br>(295[8.68],<br>388[11.41]) | 326[9.59]<br>(288[8.47],<br>372[10.94]) | 335[9.85]<br>(294[8.65],<br>386[11.35]) |
| Family history of emphysema, %                                 | 24 (6)                                   | 50 (5)                                  | 46 (3)                                  |
| Asthma before the age of 45 years, %                           | 24 (6)                                   | 71 (7)                                  | 107 (8)                                 |
| MRC-defined chronic bronchitis, %                              | 62 (17)                                  | 83 (8)                                  | 76 (6)                                  |
| Obstructive sleep apnea, n (%)                                 | 14 (4)                                   | 30 (3)                                  | 35 (2)                                  |
| Self-report of COPD, emphysema or chronic<br>bronchitis, n (%) | 32 (9)                                   | 95 (9)                                  | 78 (6)                                  |

---

SD = Standard deviation; IQR = Interquartile range; MRC = Medical Research Council

**Online Supplement Table 3.** Percent emphysema on CT scan, lung function, and cardiac structure and function on magnetic resonance image, stratified by smoking status.

|                                                      | <b>Current<br/>Smoker</b><br>N=370 | <b>Past<br/>Smoker</b><br>N=1067 | <b>Never<br/>Smoked</b><br>N=1379 |
|------------------------------------------------------|------------------------------------|----------------------------------|-----------------------------------|
| Percent emphysema, median<br>(IQR), %                | 11.3<br>(5.9, 21.4)                | 18.7<br>(10.6, 29.1)             | 13.4<br>(6.7, 22.0)               |
| FEV <sub>1</sub> percent of predicted,* mean ± SD, % | 87.5 ± 18.8                        | 95.4 ± 18.2                      | 98.4 ± 15.6                       |
| FVC percent of predicted,* mean ± SD, %              | 94.0 ± 14.7                        | 98.5 ± 15.5                      | 98.5 ± 14.0                       |
| FEV <sub>1</sub> /FVC ratio, mean ± SD, %            | 71.2 ± 11.0                        | 73.5 ± 8.7                       | 76.4 ± 7.2                        |
| LV end-diastolic volume, mean ± SD, mL               | 133 ± 35                           | 131 ± 31                         | 122 ± 29                          |
| LV end-systolic volume, mean ± SD, mL                | 46 ± 21                            | 42 ± 17                          | 37 ± 15                           |
| LV stroke volume, mean ± SD, mL                      | 88 ± 20                            | 89 ± 20                          | 85 ± 19                           |
| LV stroke volume index, † mean ± SD                  | 41.8 ± 7.2                         | 41.8 ± 7.1                       | 41.7 ± 7.3                        |
| LV cardiac output, mean ± SD, L/min                  | 5.69 ± 1.48                        | 5.79 ± 1.50                      | 5.68 ± 1.46                       |
| LV cardiac index, † mean ± SD,                       | 2.6 ± 0.3                          | 2.6 ± 0.3                        | 2.6 ± 0.3                         |
| LV ejection fraction, mean ± SD, %                   | 67 ± 8                             | 68 ± 7                           | 70 ± 7                            |
| LV mass, mean ± SD, g                                | 158 ± 42                           | 151 ± 39                         | 134 ± 35                          |

SD = Standard deviation; IQR = Interquartile range; FEV<sub>1</sub> = Forced expiratory volume in one second;

FVC = Forced vital capacity; LV = Left ventricle

\* Predicted values calculated from the National Health and Nutrition Survey III reference equations for whites, African-Americans and Hispanics and with a correction factor of 0.88 for Asians.<sup>12,25</sup>

† Indexed by body surface area

**Online Supplement Table 4.** Predicted measures of left ventricular structure and function by quintiles of percent emphysema and mean differences per 10 percentage point change in percent emphysema among current, former and never smokers.

|                                   | Predicted LV Measure according to Quintile of |      |      |      |      | Mean Difference in LV Measure | P-value |
|-----------------------------------|-----------------------------------------------|------|------|------|------|-------------------------------|---------|
|                                   | Percent Emphysema                             |      |      |      |      | (95% CI) per 10 Percentage    |         |
|                                   |                                               |      |      |      |      | Point Increase in Percent     |         |
|                                   |                                               |      |      |      |      | Emphysema                     |         |
| <b><u>Current Smokers (n)</u></b> | 74                                            | 74   | 74   | 74   | 74   | 370                           |         |
| Median Percent Emphysema, %       | 3.0                                           | 7.1  | 11.3 | 19.1 | 32.5 |                               |         |
| LV End-Diastolic Volume, mL       | 135                                           | 129  | 124  | 112  | 107  | -9.2                          | <0.001  |
|                                   |                                               |      |      |      |      | (-11.8, -6.5)                 |         |
| LV End-Systolic Volume, mL        | 46                                            | 42   | 41   | 38   | 31   | -4.4                          | <0.001  |
|                                   |                                               |      |      |      |      | (-6.2, -2.6)                  |         |
| LV Stroke Volume, mL              | 89                                            | 87   | 83   | 82   | 76   | -4.8                          | <0.001  |
|                                   |                                               |      |      |      |      | (-6.4, -3.2)                  |         |
| Cardiac Output, L/min             | 5.60                                          | 5.31 | 5.14 | 4.72 | 4.53 | -0.36                         | <0.001  |
|                                   |                                               |      |      |      |      | (-0.49, -0.24)                |         |

|                                  |      |      |      |      |      |                |        |
|----------------------------------|------|------|------|------|------|----------------|--------|
| LV Ejection Fraction,%           | 67   | 67   | 68   | 68   | 70   | 0.7            | 0.053  |
|                                  |      |      |      |      |      | (-0.005, 1.5)  |        |
| LV Mass, g                       | 161  | 162  | 159  | 160  | 147  | -5.5           | <0.001 |
|                                  |      |      |      |      |      | (-8.6, -2.5)   |        |
| <b><u>Former Smokers (n)</u></b> | 213  | 214  | 214  | 213  | 213  | 1067           |        |
| Median Percent Emphysema, %      | 5.4  | 12.3 | 18.7 | 26.4 | 38.9 |                |        |
| LV End-Diastolic Volume, mL      | 129  | 127  | 126  | 119  | 115  | -4.2           | <0.001 |
|                                  |      |      |      |      |      | (-5.4, -2.8)   |        |
| LV End-Systolic Volume, mL       | 40   | 39   | 40   | 35   | 35   | -1.9           | <0.001 |
|                                  |      |      |      |      |      | (-2.2, -0.6)   |        |
| LV Stroke Volume, mL             | 89   | 89   | 86   | 84   | 80   | -2.7           | <0.001 |
|                                  |      |      |      |      |      | (-3.6, -1.9)   |        |
| Cardiac Output, L/min            | 5.95 | 5.78 | 5.72 | 5.64 | 5.45 | -0.14          | <0.001 |
|                                  |      |      |      |      |      | (-0.21, -0.06) |        |
| LV Ejection Fraction, %          | 70   | 70   | 69   | 71   | 70   | -0.04          | 0.85   |
|                                  |      |      |      |      |      | (-0.4, 0.3)    |        |

|                                |      |      |      |      |      |                |        |
|--------------------------------|------|------|------|------|------|----------------|--------|
| LV Mass, g                     | 146  | 142  | 141  | 139  | 132  | -3.3           | <0.001 |
|                                |      |      |      |      |      | (-4.7, -1.9)   |        |
| <b><u>Never Smoked (n)</u></b> | 275  | 276  | 277  | 275  | 276  | 1379           |        |
| Median Percent Emphysema, %    | 2.7  | 7.9  | 13.4 | 19.9 | 31.2 |                |        |
| LV End-Diastolic Volume, mL    | 120  | 116  | 113  | 113  | 111  | -2.6           | <0.001 |
|                                |      |      |      |      |      | (-3.7, -1.4)   |        |
| LV End-Systolic Volume, mL     | 35   | 33   | 32   | 33   | 32   | -0.8           | 0.01   |
|                                |      |      |      |      |      | (-1.5, -0.2)   |        |
| LV Stroke Volume, mL           | 85   | 83   | 81   | 80   | 79   | -1.8           | <0.001 |
|                                |      |      |      |      |      | (-2.6, -0.9)   |        |
| Cardiac Output, L/min          | 5.82 | 5.66 | 5.61 | 5.49 | 5.18 | -0.17          | <0.001 |
|                                |      |      |      |      |      | (-0.24, -0.10) |        |
| LV Ejection Fraction, %        | 72   | 72   | 72   | 72   | 71   | 0.1            | 0.70   |
|                                |      |      |      |      |      | (-0.3, 0.4)    |        |
| LV Mass, g                     | 129  | 127  | 124  | 125  | 125  | -0.8           | 0.22   |
|                                |      |      |      |      |      | (-2.0, 0.4)    |        |

---

LV = left ventricle

Predicted measures and mean differences adjusted for age, race/ethnicity, gender, body surface area, pack-years, urine cotinine, educational attainment, diabetes mellitus, fasting plasma glucose, body mass index, hypertension, systolic and diastolic blood pressure, C-reactive protein, fibrinogen, CT scanner type and mA dose. Predicted measures and mean differences, along with 95% confidence intervals and P-values for the linear term for percent emphysema, were estimated in generalized additive models.

**Online Supplement Table 5.** Predicted measures of left ventricular structure and function by quintiles of the FEV<sub>1</sub>/FVC ratio and mean differences per 10 percentage point change in the FEV<sub>1</sub>/FVC ratio among current, former and never smokers.

|                                       | Predicted LV Measure according to Quintile of |      |      |      |      | Mean Difference in LV Measure<br>(95% CI) per 10 Percentage<br>Point Increase in the FEV <sub>1</sub> /FVC<br>Ratio | P-value |
|---------------------------------------|-----------------------------------------------|------|------|------|------|---------------------------------------------------------------------------------------------------------------------|---------|
|                                       | the FEV <sub>1</sub> /FVC Ratio               |      |      |      |      |                                                                                                                     |         |
| <b><u>Current Smokers (n)</u></b>     | 72                                            | 72   | 72   | 72   | 71   | 359                                                                                                                 |         |
| Median FEV <sub>1</sub> /FVC Ratio, % | 82.7                                          | 77.5 | 73.4 | 67.5 | 55.5 |                                                                                                                     |         |
| LV End-Diastolic Volume, mL           | 133                                           | 132  | 129  | 136  | 121  | 5.1<br>(2.0, 8.2)                                                                                                   | 0.001   |
| LV End-Systolic Volume, mL            | 44                                            | 43   | 43   | 48   | 41   | 1.5<br>(-0.6, 3.5)                                                                                                  | 0.16    |
| LV Stroke Volume, mL                  | 89                                            | 89   | 86   | 88   | 80   | 3.6<br>(1.8, 5.4)                                                                                                   | <0.001  |
| Cardiac Output, L/min                 | 5.70                                          | 5.79 | 5.68 | 5.65 | 5.24 | 0.19<br>(0.05, 0.34)                                                                                                | 0.01    |

|                                       |      |      |      |      |      |              |        |
|---------------------------------------|------|------|------|------|------|--------------|--------|
| LV Ejection Fraction,%                | 67   | 68   | 67   | 66   | 67   | -0.2         | 0.69   |
|                                       |      |      |      |      |      | (-1.0, 0.7)  |        |
| LV Mass, g                            | 155  | 160  | 157  | 170  | 154  | 0.6          | 0.71   |
|                                       |      |      |      |      |      | (-2.8, 4.0)  |        |
| <b><u>Former Smokers (n)</u></b>      | 206  | 206  | 206  | 206  | 205  | 1029         |        |
| Median FEV <sub>1</sub> /FVC Ratio, % | 82.6 | 78.2 | 74.7 | 70.3 | 63.4 |              |        |
| LV End-Diastolic Volume, mL           | 135  | 132  | 132  | 130  | 127  | 3.2          | <0.001 |
|                                       |      |      |      |      |      | (1.3, 5.0)   |        |
| LV End-Systolic Volume, mL            | 42   | 42   | 41   | 40   | 41   | 0.3          | 0.60   |
|                                       |      |      |      |      |      | (-0.8, 1.4)  |        |
| LV Stroke Volume, mL                  | 93   | 90   | 91   | 90   | 86   | 2.9          | <0.001 |
|                                       |      |      |      |      |      | (1.6, 4.2)   |        |
| Cardiac Output, L/min                 | 5.99 | 5.96 | 6.00 | 5.80 | 5.50 | 0.17         | 0.003  |
|                                       |      |      |      |      |      | (0.06, 0.28) |        |
| LV Ejection Fraction, %               | 70   | 69   | 70   | 70   | 68   | 0.4          | 0.17   |
|                                       |      |      |      |      |      | (-0.2, 0.9)  |        |

|                                       |      |      |      |      |      |                       |       |
|---------------------------------------|------|------|------|------|------|-----------------------|-------|
| LV Mass, g                            | 156  | 153  | 153  | 151  | 153  | 0.2<br>(-1.8, 2.2)    | 0.86  |
| <b><u>Never Smoked (n)</u></b>        | 267  | 268  | 268  | 268  | 267  | 1338                  |       |
| Median FEV <sub>1</sub> /FVC Ratio, % | 84.2 | 80.2 | 77.3 | 73.7 | 67.5 |                       |       |
| LV End-Diastolic Volume, mL           | 120  | 121  | 121  | 119  | 123  | -1.1<br>(-2.8, 0.5)   | 0.19  |
| LV End-Systolic Volume, mL            | 36   | 36   | 37   | 37   | 38   | -1.0<br>(-19, -0.1)   | 0.03  |
| LV Stroke Volume, mL                  | 83   | 85   | 84   | 82   | 85   | -0.1<br>(-1.3, 1.1)   | 0.82  |
| Cardiac Output, L/min                 | 5.66 | 5.56 | 5.48 | 5.51 | 5.46 | 0.07<br>(-0.03, 0.17) | 0.18  |
| LV Ejection Fraction, %               | 70   | 71   | 70   | 70   | 70   | 0.5<br>(-0.03, 0.9)   | 0.07  |
| LV Mass, g                            | 135  | 133  | 132  | 134  | 140  | -2.6                  | 0.003 |

(-4.3, -0.9)

---

FEV<sub>1</sub> = Forced expiratory volume in one second; FVC = Forced vital capacity; LV = Left ventricle

Predicted measures and mean differences adjusted for age, race/ethnicity, gender and body surface area, pack-years, urine cotinine, educational attainment, height, diabetes mellitus, fasting plasma glucose, hypertension, systolic and diastolic blood pressure, C-reactive protein, and fibrinogen. Predicted measures and mean differences, along with 95% confidence intervals and P-values for the linear term for FEV<sub>1</sub>/FVC ratio, were estimated in generalized additive models.

**Online Supplement Table 6.** Predicted measures of left ventricular structure and function by quintiles of the forced expiratory volume in one second and mean differences per 750 mL increase in forced expiratory volume in one second among current, former and never smokers.

|                                   | Quintile of Percent FEV <sub>1</sub> (mL) |      |      |      |      | Mean Difference in Left<br>Ventricular Measure (95% CI)<br>by 750 mL (SD) Increase in<br>FEV <sub>1</sub> | P-value |
|-----------------------------------|-------------------------------------------|------|------|------|------|-----------------------------------------------------------------------------------------------------------|---------|
| <b><u>Current Smokers (n)</u></b> | 72                                        | 72   | 72   | 72   | 72   | 360                                                                                                       |         |
| Median FEV <sub>1</sub> , mL      | 3423                                      | 2771 | 2360 | 1969 | 1419 |                                                                                                           |         |
| LV End-Diastolic Volume, mL       | 134                                       | 132  | 121  | 120  | 113  | 6.8<br>(2.1, 11.5)                                                                                        | 0.005   |
| LV End-Systolic Volume, mL        | 44                                        | 44   | 39   | 37   | 37   | 2.6<br>(-0.5, 5.7)                                                                                        | 0.10    |
| LV Stroke Volume, mL              | 90                                        | 89   | 83   | 83   | 78   | 4.2<br>(1.5, 7.0)                                                                                         | 0.003   |
| Cardiac Output, L/min             | 5.59                                      | 5.41 | 5.54 | 5.20 | 5.19 | 0.16                                                                                                      | 0.16    |

|                                  |      |      |      |      |      |               |        |
|----------------------------------|------|------|------|------|------|---------------|--------|
|                                  |      |      |      |      |      | (-0.06, 0.38) |        |
| LV Ejection Fraction,%           | 68   | 67   | 68   | 70   | 69   | -0.7          | 0.26   |
|                                  |      |      |      |      |      | (-2.0, 0.5)   |        |
| LV Mass, g                       | 147  | 155  | 146  | 142  | 146  | 0.9           | 0.75   |
|                                  |      |      |      |      |      | (-4.3, 6.0)   |        |
| <b><u>Former Smokers (n)</u></b> | 207  | 207  | 207  | 207  | 206  | 1034          |        |
| Median FEV <sub>1</sub> , mL     | 3547 | 2954 | 2518 | 2131 | 1641 |               |        |
| LV End-Diastolic Volume, mL      | 128  | 122  | 116  | 117  | 113  | 6.5           | <0.001 |
|                                  |      |      |      |      |      | (4.1, 9.0)    |        |
| LV End-Systolic Volume, mL       | 38   | 36   | 33   | 34   | 33   | 2.5           | <0.001 |
|                                  |      |      |      |      |      | (1.1, 3.9)    |        |
| LV Stroke Volume, mL             | 90   | 86   | 83   | 83   | 80   | 4.0           | <0.001 |
|                                  |      |      |      |      |      | (2.3, 5.8)    |        |
| Cardiac Output, L/min            | 5.92 | 5.71 | 5.47 | 5.49 | 5.36 | 0.19          | 0.01   |
|                                  |      |      |      |      |      | (0.04, 0.33)  |        |
| LV Ejection Fraction, %          | 71   | 71   | 72   | 71   | 71   | -0.3          | 0.47   |

|                                |      |      |      |      |      |               |      |
|--------------------------------|------|------|------|------|------|---------------|------|
|                                |      |      |      |      |      | (-1.0, 0.4)   |      |
| LV Mass, g                     | 133  | 133  | 131  | 135  | 134  | 0.3           | 0.79 |
|                                |      |      |      |      |      | (-2.2, 2.9)   |      |
| <b><u>Never Smoked (n)</u></b> | 270  | 269  | 270  | 269  | 269  | 1347          |      |
| Median FEV <sub>1</sub> , mL   | 3365 | 2649 | 2268 | 1949 | 1523 |               |      |
| LV End-Diastolic Volume, mL    | 106  | 102  | 102  | 102  | 104  | 2.3           | 0.06 |
|                                |      |      |      |      |      | (-0.1, 4.7)   |      |
| LV End-Systolic Volume, mL     | 30   | 28   | 27   | 28   | 28   | 0.7           | 0.31 |
|                                |      |      |      |      |      | (-0.6, 2.0)   |      |
| LV Stroke Volume, mL           | 76   | 73   | 74   | 74   | 76   | 1.6           | 0.07 |
|                                |      |      |      |      |      | (-0.1, 3.3)   |      |
| Cardiac Output, L/min          | 5.17 | 5.07 | 5.10 | 5.01 | 5.17 | 0.09          | 0.23 |
|                                |      |      |      |      |      | (-0.06, 0.24) |      |
| LV Ejection Fraction, %        | 73   | 72   | 73   | 73   | 73   | 0.02          | 0.96 |
|                                |      |      |      |      |      | (-0.7, 0.7)   |      |
| LV Mass, g                     | 118  | 115  | 114  | 116  | 118  | 1.4           | 0.25 |

(-1.0, 3.9)

---

FEV<sub>1</sub> = Forced expiratory volume in one second; LV = Left ventricle

**Online Supplement Table 7.** Mean differences and 95% confidence intervals per 10 percentage point increase in percent emphysema among current, former and never smokers in sensitivity analyses.

|                               | <b>1.</b>                                                       | <b>2.</b>                                                          | <b>3.</b>                                            | <b>4.</b>                                                        | <b>5.</b>                                      | <b>6.</b>                                                                                         | <b>7.</b>                                                                   |
|-------------------------------|-----------------------------------------------------------------|--------------------------------------------------------------------|------------------------------------------------------|------------------------------------------------------------------|------------------------------------------------|---------------------------------------------------------------------------------------------------|-----------------------------------------------------------------------------|
|                               | <b>Controlling for height and weight instead of BSA and BMI</b> | <b>Controlling for height<sup>2,7</sup> instead of BSA and BMI</b> | <b>Weighted by the probability of MRI completion</b> | <b>Including 322 participants with restriction on spirometry</b> | <b>Controlling for additional covariates**</b> | <b>Controlling for age of smoking initiation/cessation + cigarettes/day instead of pack-years</b> | <b>Excluding 25 participants with subclinical wall motion abnormalities</b> |
| <b><u>Current Smokers</u></b> |                                                                 |                                                                    |                                                      |                                                                  |                                                |                                                                                                   |                                                                             |
| LV End-Diastolic Volume (mL)  | -8.8‡<br>(-11.5, -6.2)                                          | -9.4‡<br>(-12.2, -6.7)                                             | -9.0‡<br>(-11.7, -6.4)                               | -9.3‡<br>(-11.8, -6.8)                                           | -9.6‡<br>(-12.3, -6.9)                         | -8.7‡<br>(-11.3, -6.0)                                                                            | -7.8‡<br>(-10.4, -5.3)                                                      |
| LV End-Systolic Volume (mL)   | -4.2‡<br>(-6.0, -2.5)                                           | -4.4‡<br>(-6.2, -2.6)                                              | -4.4‡<br>(-6.2, -2.7)                                | -4.5‡<br>(-6.1, -2.8)                                            | -4.6‡<br>(-6.4, -2.8)                          | -4.2‡<br>(-6.0, -2.5)                                                                             | -3.3‡<br>(-5.0, -1.7)                                                       |

|                              |                          |                          |                          |                          |                          |                          |                          |
|------------------------------|--------------------------|--------------------------|--------------------------|--------------------------|--------------------------|--------------------------|--------------------------|
| LV Stroke Volume (mL)        | -4.6‡<br>(-6.2, -3.0)    | -5.1‡<br>(-6.7, -3.4)    | -4.6‡<br>(-6.2, -3.1)    | -4.8‡<br>(-6.3, -3.3)    | -5.0‡<br>(-6.6, -3.4)    | -4.4‡<br>(-6.0, -2.9)    | -4.5‡<br>(-6.1, -2.9)    |
| LV Cardiac Output<br>(L/min) | -0.34‡<br>(-0.46, -0.21) | -0.36‡<br>(-0.49, -0.23) | -0.35‡<br>(-0.47, -0.22) | -0.35‡<br>(-0.47, -0.22) | -0.37‡<br>(-0.50, -0.24) | -0.34‡<br>(-0.46, -0.22) | -0.34‡<br>(-0.47, -0.21) |
| LV Ejection Fraction (%)     | 0.7<br>(-0.1, 1.4)       | 0.7<br>(-0.1, 1.4)       | 0.8*<br>(0.03, 1.5)      | 0.8*<br>(0.1, 1.5)       | 0.8<br>(-0.003, 1.5)     | 0.7<br>(-0.02, 1.5)      | 0.4<br>(-0.3, 1.1)       |
| LV Mass (gm)                 | -5.3‡<br>(-8.3, -2.3)    | -6.1‡<br>(-9.3, -3.0)    | -5.5‡<br>(-8.5, -2.5)    | -5.0‡<br>(-7.9, -2.2)    | -5.6‡<br>(-8.8, -2.5)    | -4.9‡<br>(-7.9, -1.9)    | -4.6‡<br>(-7.6, -1.6)    |

### **Former Smokers**

|                                 |                       |                       |                       |                       |                       |                       |                       |
|---------------------------------|-----------------------|-----------------------|-----------------------|-----------------------|-----------------------|-----------------------|-----------------------|
| LV End-Diastolic Volume<br>(mL) | -4.2‡<br>(-5.5, -2.9) | -5.0‡<br>(-6.3, -3.7) | -4.2‡<br>(-5.5, -2.9) | -4.3‡<br>(-5.6, -3.1) | -4.0‡<br>(-5.3, -2.8) | -4.1‡<br>(-5.4, -2.8) | -4.1‡<br>(-5.4, -2.9) |
| LV End-Systolic Volume<br>(mL)  | -1.4‡<br>(-2.2, -0.7) | -1.7‡<br>(-2.5, -0.9) | -1.4‡<br>(-2.2, -0.6) | -1.6‡<br>(-2.4, -0.9) | -1.3‡<br>(-2.1, -0.5) | -1.4‡<br>(-2.1, -0.6) | -1.4‡<br>(-2.2, -0.7) |
| LV Stroke Volume (mL)           | -2.8‡<br>(-3.7, -1.9) | -3.3‡<br>(-4.2, -2.4) | -2.8‡<br>(-3.7, -1.9) | -2.7‡<br>(-3.5, -1.9) | -2.7‡<br>(-3.6, -1.8) | -2.7‡<br>(-3.6, -1.9) | -2.7‡<br>(-3.6, -1.8) |
| LV Cardiac Output               | -0.14‡                | -0.17‡                | -0.14‡                | -0.14‡                | -0.13‡                | -0.14‡                | -0.14‡                |

|                             |                |                |                |                |                |                |                |
|-----------------------------|----------------|----------------|----------------|----------------|----------------|----------------|----------------|
| (L/min)                     | (-0.21, -0.06) | (-0.25, -0.10) | (-0.21, -0.06) | (-0.20, -0.07) | (-0.20, -0.05) | (-0.21, -0.06) | (-0.21, -0.06) |
| LV Ejection Fraction (%)    | -0.02          | -0.01          | -0.04          | 0.1            | -0.1           | -0.1           | 0.0003         |
|                             | (-0.4, 0.4)    | (-0.4, 0.4)    | (-0.4, 0.3)    | (-0.3, 0.4)    | (-0.5, 0.3)    | (-0.4, 0.3)    | (-0.4, 0.4)    |
| LV Mass (gm)                | -3.3‡          | -4.6‡          | -3.3‡          | -3.2‡          | -3.4‡          | -3.2‡          | -3.2‡          |
|                             | (-4.7, -1.9)   | (-6.1, -3.1)   | (-4.7, -1.9)   | (-4.5, -1.8)   | (-4.8, -2.0)   | (-4.6, -1.9)   | (-4.6, -1.8)   |
| <b><u>Never Smokers</u></b> |                |                |                |                |                |                |                |
| LV End-Diastolic Volume     | -2.6‡          | -4.1‡          | -2.7‡          | -2.3‡          | -2.7‡          | -2.6‡          | -2.5‡          |
| (mL)                        | (-3.8, -1.4)   | (-5.2, -2.9)   | (-3.9, -1.6)   | (-3.4, -1.2)   | (-3.9, -1.5)   | (-3.7, -1.4)   | (-3.6, -1.3)   |
| LV End-Systolic Volume      | -0.8*          | -1.2‡          | -0.9†          | -0.7*          | -0.8*          | -0.8*          | -0.8*          |
| (mL)                        | (-1.4, -0.1)   | (-1.9, -0.6)   | (-1.5, -0.2)   | (-1.4, -0.1)   | (-1.5, -0.2)   | (-1.5, -0.2)   | (-1.4, -0.2)   |
| LV Stroke Volume (mL)       | -1.8‡          | -2.8‡          | -1.9‡          | -1.6‡          | -1.9‡          | -1.8‡          | -1.7‡          |
|                             | (-2.7, -1.0)   | (-3.7, -2.0)   | (-2.7, -1.0)   | (-2.4, -0.7)   | (-2.7, -1.0)   | (-2.6, -0.9)   | (-2.5, -0.8)   |
| LV Cardiac Output           | -0.17‡         | -0.22‡         | -0.18‡         | -0.15‡         | -0.16‡         | -0.17‡         | -0.17‡         |
| (L/min)                     | (-0.24, -0.10) | (-0.29, -0.15) | (-0.25, -0.11) | (-0.22, -0.08) | (-0.23, -0.08) | (-0.24, -0.10) | (-0.24, -0.09) |
| LV Ejection Fraction (%)    | 0.04           | 0.05           | 0.1            | 0.1            | 0.1            | 0.1            | 0.1            |
|                             | (-0.3, 0.4)    | (-0.3, 0.4)    | (-0.3, 0.4)    | (-0.3, 0.4)    | (-0.3, 0.4)    | (-0.3, 0.4)    | (-0.3, 0.4)    |

|              |             |              |             |             |             |             |             |
|--------------|-------------|--------------|-------------|-------------|-------------|-------------|-------------|
| LV Mass (gm) | -0.9        | -3.1‡        | -0.8        | -0.9        | -0.9        | -0.8        | -0.7        |
|              | (-2.1, 0.4) | (-4.4, -1.7) | (-2.0, 0.4) | (-2.1, 0.3) | (-2.1, 0.3) | (-2.0, 0.5) | (-2.0, 0.5) |

---

LV = left ventricle; BMI = body mass index; BSA = body surface area; MRI = magnetic resonance imaging

All analyses adjusted for age, race/ethnicity, gender, body surface area, pack-years, urine cotinine, educational attainment, diabetes mellitus, fasting plasma glucose, body mass index, hypertension, systolic and diastolic blood pressure, C-reactive protein, fibrinogen, CT scanner type and mA dose, except as noted in column headings.

\* P-value = 0.01 – 0.05

† P-value = 0.001 – 0.01

‡ P-value < 0.001

\*\*Further adjusted for physical exercise, time before first cigarette in the morning, depth of smoke inhalation, cigar smoking status, cumulative cigar-years, pipe smoking status, cumulative pipe-years, presence of sleep breathing disorder, low density lipoprotein, and high density lipoprotein.

**Online Supplement Table 8.** Mean differences and 95% confidence intervals per 10 percentage point increase in FEV1/FVC ratio among current, former and never smokers in sensitivity analyses.

|                               | 1.                                                              | 2.                                                                 | 3.                                                   | 4.                                                               | 5.                                             | 6.                                                                                                | 7.                                                                          |
|-------------------------------|-----------------------------------------------------------------|--------------------------------------------------------------------|------------------------------------------------------|------------------------------------------------------------------|------------------------------------------------|---------------------------------------------------------------------------------------------------|-----------------------------------------------------------------------------|
|                               | <b>Controlling for height and weight instead of BSA and BMI</b> | <b>Controlling for height<sup>2,7</sup> instead of BSA and BMI</b> | <b>Weighted by the probability of MRI completion</b> | <b>Including 322 participants with restriction on spirometry</b> | <b>Controlling for additional covariates**</b> | <b>Controlling for age of smoking initiation/cessation + cigarettes/day instead of pack-years</b> | <b>Excluding 25 participants with subclinical wall motion abnormalities</b> |
| <b><u>Current Smokers</u></b> |                                                                 |                                                                    |                                                      |                                                                  |                                                |                                                                                                   |                                                                             |
| LV End-Diastolic Volume (mL)  | 4.9†<br>(1.8, 7.9)                                              | 6.3‡<br>(3.2, 9.3)                                                 | 5.0†<br>(2.0, 8.0)                                   | 4.5†<br>(1.6, 7.4)                                               | 5.2†<br>(2.0, 8.4)                             | 5.0†<br>(1.9, 8.0)                                                                                | 4.8†<br>(1.9, 7.7)                                                          |
| LV End-Systolic               | 1.4                                                             | 1.9                                                                | 1.5                                                  | 1.4                                                              | 1.7                                            | 1.3                                                                                               | 1.2                                                                         |

|                              |                       |                       |                       |                       |                       |                       |                       |
|------------------------------|-----------------------|-----------------------|-----------------------|-----------------------|-----------------------|-----------------------|-----------------------|
| Volume (mL)                  | (-0.6, 3.5)           | (-0.1, 3.9)           | (-0.5, 3.6)           | (-0.5, 3.3)           | (-0.5, 3.8)           | (-0.7, 3.3)           | (-0.6, 3.1)           |
| LV Stroke Volume<br>(mL)     | 3.5‡<br>(1.7, 5.3)    | 4.3‡<br>(2.5, 6.2)    | 3.5‡<br>(1.7, 5.2)    | 3.1‡<br>(1.4, 4.8)    | 3.5‡<br>(1.7, 5.4)    | 3.6‡<br>(1.9, 5.4)    | 3.6‡<br>(1.8, 5.3)    |
| LV Cardiac Output<br>(L/min) | 0.18*<br>(0.04, 0.32) | 0.23†<br>(0.09, 0.38) | 0.17†<br>(0.02, 0.31) | 0.13<br>(-0.01, 0.27) | 0.19*<br>(0.04, 0.34) | 0.19*<br>(0.04, 0.33) | 0.19*<br>(0.04, 0.33) |
| LV Ejection Fraction<br>(%)  | -0.2<br>(-1.0, 0.7)   | -0.2<br>(-1.0, 0.6)   | -0.2<br>(-1.1, 0.6)   | -0.3<br>(-1.1, 0.5)   | -0.3<br>(-1.2, 0.5)   | -0.1<br>(-0.9, 0.8)   | -0.1<br>(-0.9, 0.7)   |
| LV Mass (gm)                 | 0.3<br>(-3.1, 3.7)    | 2.4<br>(-1.1, 5.8)    | 0.6<br>(-2.7, 4.0)    | 0.7<br>(-2.5, 3.8)    | 0.7<br>(-2.8, 4.2)    | 0.3<br>(-3.0, 3.6)    | 0.2<br>(-3.1, 3.5)    |

**Former Smokers**

|                                 |                    |                    |                    |                    |                    |                    |                       |
|---------------------------------|--------------------|--------------------|--------------------|--------------------|--------------------|--------------------|-----------------------|
| LV End-Diastolic<br>Volume (mL) | 3.2‡<br>(1.3, 5.0) | 3.7‡<br>(1.8, 5.6) | 3.4‡<br>(1.6, 5.3) | 2.9†<br>(1.1, 4.7) | 2.9†<br>(1.0, 4.8) | 3.2‡<br>(1.4, 5.1) | 2.8†<br>(0.9, 4.6)    |
| LV End-Systolic<br>Volume (mL)  | 0.3<br>(-0.8, 1.4) | 0.5<br>(-0.6, 1.6) | 0.3<br>(-0.8, 1.4) | 0.4<br>(-0.7, 1.5) | 0.4<br>(-0.7, 1.5) | 0.4<br>(-0.7, 1.5) | -0.005<br>(-1.1, 1.1) |
| LV Stroke Volume<br>(mL)        | 2.8‡<br>(1.5, 4.1) | 3.2‡<br>(1.9, 4.5) | 3.1‡<br>(1.8, 4.4) | 2.5‡<br>(1.2, 3.7) | 2.5‡<br>(1.2, 3.8) | 2.9‡<br>(1.6, 4.2) | 2.8‡<br>(1.5, 4.1)    |

|                      |              |              |              |              |              |              |              |
|----------------------|--------------|--------------|--------------|--------------|--------------|--------------|--------------|
| LV Cardiac Output    | 0.17†        | 0.20‡        | 0.18†        | 0.14†        | 0.16†        | 0.16†        | 0.17†        |
| (L/min)              | (0.06, 0.28) | (0.08, 0.31) | (0.07, 0.29) | (0.05, 0.24) | (0.05, 0.27) | (0.05, 0.27) | (0.06, 0.28) |
| LV Ejection Fraction | 0.4          | 0.4          | 0.4          | 0.3          | 0.3          | 0.4          | 0.5          |
| (%)                  | (-0.2, 0.9)  | (-0.2, 0.9)  | (-0.1, 1.0)  | (-0.2, 0.8)  | (-0.3, 0.8)  | (-0.2, 0.9)  | (-0.03, 1.0) |
| LV Mass (gm)         | 0.2          | 0.9          | 0.2          | 0.8          | 0.5          | 0.4          | -0.3         |
|                      | (-1.8, 2.1)  | (-1.2, 3.0)  | (-1.7, 2.2)  | (-1.0, 2.7)  | (-1.5, 2.4)  | (-1.6, 2.3)  | (-2.2, 1.7)  |

**Never Smokers**

|                      |               |               |               |               |               |               |               |
|----------------------|---------------|---------------|---------------|---------------|---------------|---------------|---------------|
| LV End-Diastolic     | -1.2          | -0.1          | -1.2          | -1.2          | -0.9          | -1.1          | -0.7          |
| Volume (mL)          | (-2.8, -6.7)  | (-1.9, -3.9)  | (-2.8, -6.7)  | (-2.9, -6.8)  | (-2.6, -5.9)  | (-2.8, -6.6)  | (-2.4, -5.4)  |
| LV End-Systolic      | -1.0*         | -0.7          | -1.0*         | -1.1*         | -0.9*         | -1.0*         | -0.7          |
| Volume (mL)          | (-1.9, -0.1)  | (-1.6, 0.2)   | (-1.9, -0.1)  | (-1.9, -0.2)  | (-1.8, -0.04) | (-1.9, -0.1)  | (-1.6, 0.1)   |
| LV Stroke Volume     | -0.1          | 0.6           | -0.1          | -0.2          | 0.1           | -0.1          | -0.01         |
| (mL)                 | (-1.3, 1.1)   | (-0.7, 1.8)   | (-1.3, 1.1)   | (-1.3, 1.0)   | (-1.1, 1.3)   | (-1.3, 1.1)   | (-1.2, 1.2)   |
| LV Cardiac Output    | 0.07          | 0.11‡         | 0.08          | 0.06          | 0.09          | 0.07          | 0.09          |
| (L/min)              | (-0.04, 0.17) | (0.004, 0.21) | (-0.03, 0.18) | (-0.04, 0.16) | (-0.02, 0.19) | (-0.03, 0.17) | (-0.02, 0.19) |
| LV Ejection Fraction | 0.5           | 0.4           | 0.5           | 0.48          | 0.5           | 0.5           | 0.4           |

|              |              |              |              |               |              |              |              |
|--------------|--------------|--------------|--------------|---------------|--------------|--------------|--------------|
| (%)          | (-0.03, 0.9) | (-0.04, 0.9) | (0.01, 1.0)  | (0.001, 0.97) | (-0.01, 1.0) | (-0.03, 0.9) | (-0.1, 0.9)  |
| LV Mass (gm) | -2.6†        | -1.2         | -2.6†        | -2.6†         | -2.4†        | -2.6†        | -2.5†        |
|              | (-4.3, -0.9) | (-3.1, 0.7)  | (-4.3, -0.9) | (-4.2, -0.9)  | (-4.2, -0.7) | (-4.3, -0.9) | (-4.2, -0.8) |

---

LV = left ventricle; BMI = body mass index; BSA = body surface area; MRI = magnetic resonance imaging

All analyses adjusted for age, race/ethnicity, gender, body surface area, height, pack-years, urine cotinine, educational attainment, diabetes mellitus, fasting plasma glucose, body mass index, hypertension, systolic and diastolic blood pressure, C-reactive protein and fibrinogen, except as noted in column headings.

\* P-value = 0.01 – 0.05

† P-value = 0.001 – 0.01

‡ P-value < 0.001

\*\*Further adjusted for physical exercise, time before first cigarette in the morning, depth of smoke inhalation, cigar smoking status, cumulative cigar-years, pipe smoking status, cumulative pipe-years, presence of sleep breathing disorder, low density lipoprotein, and high density lipoprotein.

**Online Supplement Table 9.** Mean differences and 95% confidence intervals per 10 percentage point increase in percent emphysema among current, former and never smokers in CT-scan related sensitivity analyses.

|                               | <b>1.</b>                | <b>2.</b>                | <b>3.</b>                | <b>4.</b>                |
|-------------------------------|--------------------------|--------------------------|--------------------------|--------------------------|
|                               | <b>Percent</b>           | <b>Percent</b>           | <b>Percent</b>           | <b>Percent</b>           |
|                               | <b>emphysema</b>         | <b>emphysema</b>         | <b>emphysema</b>         | <b>emphysema</b>         |
|                               | <b>defined at a</b>      | <b>defined at a</b>      | <b>defined at a</b>      | <b>defined at a</b>      |
|                               | <b>threshold of</b>      | <b>threshold of</b>      | <b>threshold of</b>      | <b>threshold of</b>      |
|                               | <b>-950 Hounsfield</b>   | <b>-910 Hounsfield</b>   | <b>-910 Hounsfield</b>   | <b>-950 Hounsfield</b>   |
|                               | <b>units</b>             | <b>units corrected</b>   | <b>units corrected</b>   | <b>units corrected</b>   |
|                               |                          | <b>for variation in</b>  | <b>for variation in</b>  | <b>for variation in</b>  |
|                               |                          | <b>attenuation of</b>    | <b>attenuation of</b>    | <b>attenuation of</b>    |
|                               |                          | <b>air outside the</b>   | <b>air in the</b>        | <b>air in the</b>        |
|                               |                          | <b>body</b>              | <b>trachea</b>           | <b>trachea</b>           |
| <b><u>Current Smokers</u></b> |                          |                          |                          |                          |
| LV End-Diastolic Volume (mL)  | -27.3‡<br>(-36.7, -17.8) | -7.5‡<br>(-9.9, -5.0)    | -6.4‡<br>(-8.7, -4.1)    | -12.1‡<br>(-17.8, -6.3)  |
| LV End-Systolic Volume (mL)   | -11.4‡<br>(-17.7, -5.1)  | -3.6‡<br>(-5.2, -2.0)    | -2.9‡<br>(-4.4, -1.3)    | -4.6*<br>(-8.4, -0.8)    |
| LV Stroke Volume (mL)         | -15.8‡<br>(-21.4, -10.2) | -3.9‡<br>(-5.3, -2.4)    | -3.5‡<br>(-4.9, -2.1)    | -7.5‡<br>(-10.9, -4.1)   |
| LV Cardiac Output (L/min)     | -1.07‡<br>(-1.51, -0.63) | -0.30‡<br>(-0.41, -0.19) | -0.25‡<br>(-0.36, -0.14) | -0.48‡<br>(-0.75, -0.21) |

|                              |                          |                          |                          |                          |
|------------------------------|--------------------------|--------------------------|--------------------------|--------------------------|
| LV Ejection Fraction (%)     | 0.8<br>(-1.8, 3.5)       | 0.6<br>(-0.1, 1.2)       | 0.4<br>(-0.3, 1.0)       | 0.2<br>(-1.4, 1.8)       |
| LV Mass (gm)                 | -11.3*<br>(-22.1, -0.5)  | -3.8†<br>(-6.6, -1.0)    | -3.4*<br>(-6.1, -0.8)    | -3.6<br>(-10.1, 2.8)     |
| <b><u>Former Smokers</u></b> |                          |                          |                          |                          |
| LV End-Diastolic Volume (mL) | -13.3‡<br>(-18.1, -8.5)  | -3.7‡<br>(-4.8, -2.5)    | -3.0‡<br>(-4.1, -1.9)    | -4.5†<br>(-7.4, -1.7)    |
| LV End-Systolic Volume (mL)  | -3.4*<br>(-6.3, -0.5)    | -1.1†<br>(-1.8, -0.4)    | -0.9†<br>(-1.6, -0.2)    | -0.6<br>(-2.3, 1.1)      |
| LV Stroke Volume (mL)        | -9.9‡<br>(-13.3, -6.6)   | -2.5‡<br>(-3.3, -1.7)    | -2.1‡<br>(-2.9, -1.3)    | -3.9‡<br>(-5.9, -1.9)    |
| LV Cardiac Output (L/min)    | -0.49‡<br>(-0.77, -0.20) | -0.13‡<br>(-0.20, -0.06) | -0.10†<br>(-0.17, -0.03) | -0.19*<br>(-0.36, -0.03) |
| LV Ejection Fraction (%)     | -0.7<br>(-2.1, 0.7)      | -0.1<br>(-0.4, 0.3)      | -0.04<br>(-0.4, 0.3)     | -0.5<br>(-1.3, 0.4)      |
| LV Mass (gm)                 | -6.8*<br>(-12.1, -1.5)   | -2.8‡<br>(-4.1, -1.6)    | -2.3‡<br>(-3.5, -1.1)    | -1.3<br>(-4.4, 1.8)      |
| <b><u>Never Smokers</u></b>  |                          |                          |                          |                          |
| LV End-Diastolic Volume (mL) | -7.6†<br>(-12.8, -2.3)   | -2.3‡<br>(-3.3, -1.3)    | -2.2‡<br>(-3.2, -1.3)    | -3.9†<br>(-6.7, -1.1)    |
| LV End-Systolic Volume (mL)  | -2.1<br>(-5.0, 0.8)      | -0.8†<br>(-1.3, -0.2)    | -1.0‡<br>(-1.5, -0.4)    | -1.9*<br>(-3.4, -0.4)    |
| LV Stroke Volume (mL)        | -5.5†                    | -1.5‡                    | -1.3‡                    | -2.0*                    |

|                           |                |                |                |                |
|---------------------------|----------------|----------------|----------------|----------------|
|                           | (-9.3, -1.6)   | (-2.2, -0.8)   | (-2.0, -0.6)   | (-4.0, -0.004) |
| LV Cardiac Output (L/min) | -0.58‡         | -0.14‡         | -0.13‡         | -0.25†         |
|                           | (-0.90, -0.25) | (-0.20, -0.07) | (-0.19, -0.07) | (-0.42, -0.08) |
| LV Ejection Fraction (%)  | 0.1            | 0.1            | 0.2            | 0.6            |
|                           | (-1.5, 1.7)    | (-0.2, 0.4)    | (-0.1, 0.5)    | (-0.2, 1.4)    |
| LV Mass (gm)              | 1.6            | -0.5           | -0.6           | -0.02          |
|                           | (-4.0, 7.2)    | (-1.5, 0.6)    | (-1.6, 0.5)    | (-3.0, 2.9)    |

---

LV = left ventricle

All analyses adjusted for age, race/ethnicity, gender, body surface area, pack-years, urine cotinine, educational attainment, diabetes mellitus, fasting plasma glucose, body mass index, hypertension, systolic and diastolic blood pressure, C-reactive protein, fibrinogen, CT scanner type and mA dose.

\* P-value = 0.01 – 0.05

† P-value = 0.001 – 0.01

‡ P-value < 0.001
